# Supplementary material
Source: HighWire-hosted journal article supplement (https://bmjopen.bmj.com/content/9/8/e024098)
Supplement: inline-supplementary-material-1 [file inline-supplementary-material-1.pdf]

## Appendix: Descriptive statistics

Table 1: Sample summary statistics

|                | (1)<br>Total | (2)<br>Male | (3)<br>Female |
|----------------|--------------|-------------|---------------|
| Age 40-44      | 46,581       | 22,778      | 23,803        |
| Share of total | 0.200        | 0.098       | 0.102         |
| Age 45-49      | 57,069       | 27,654      | 29,415        |
| Share of total | 0.245        | 0.119       | 0.127         |
| Age 50-54      | 66,545       | 32,701      | 33,844        |
| Share of total | 0.285        | 0.140       | 0.145         |
| Age 55-59      | 63,079       | 32,297      | 30,782        |
| Share of total | 0.269        | 0.138       | 0.131         |
| Total          | 233,274      | 115,430     | 117,844       |
| Share of total | 1.000        | 0.495       | 0.505         |

30 percent random sample of the population of employed individuals 40-59 years of age in 1993 who were hospitalized at some point between years 1994-2004.

Table 2: Sample summary statistics

| Variable           | Hospitalized Men |           | Hospitalized Women |           | Non-hospitalized Men |           | Non-hospitalized Women |           |
|--------------------|------------------|-----------|--------------------|-----------|----------------------|-----------|------------------------|-----------|
|                    | (1)<br>mean      | (2)<br>sd | (3)<br>mean        | (4)<br>sd | (5)<br>mean          | (6)<br>sd | (7)<br>mean            | (8)<br>Sd |
| Age                | 52.477           | 7.195     | 51.906             | 7.078     | 51.571               | 7.662     | 52.161                 | 7.826     |
| Earnings           | 6.845            | 5.152     | 4.694              | 2.732     | 7.497                | 6.166     | 5.035                  | 3.319     |
| Non-labor income   | 3.741            | 29.641    | 4.535              | 19.479    | 4.041                | 30.506    | 5.028                  | 25.609    |
| Household earnings | 10.586           | 30.201    | 9.230              | 19.799    | 11.538               | 31.264    | 10.062                 | 25.987    |
| Infection          | 0.024            | 0.154     | 0.019              | 0.138     |                      |           |                        |           |
| Neoplasm           | 0.062            | 0.242     | 0.175              | 0.380     |                      |           |                        |           |
| Blood              | 0.003            | 0.056     | 0.007              | 0.084     |                      |           |                        |           |
| Endocrine          | 0.019            | 0.138     | 0.025              | 0.155     |                      |           |                        |           |
| Mental             | 0.041            | 0.199     | 0.030              | 0.169     |                      |           |                        |           |
| Nerve              | 0.026            | 0.159     | 0.020              | 0.139     |                      |           |                        |           |
| Eye                | 0.013            | 0.115     | 0.011              | 0.104     |                      |           |                        |           |
| Ear                | 0.014            | 0.118     | 0.013              | 0.114     |                      |           |                        |           |
| Circulatory        | 0.186            | 0.389     | 0.088              | 0.284     |                      |           |                        |           |
| Respiratory        | 0.048            | 0.213     | 0.041              | 0.198     |                      |           |                        |           |
| Digestive          | 0.125            | 0.331     | 0.110              | 0.313     |                      |           |                        |           |
| Skin               | 0.008            | 0.090     | 0.007              | 0.085     |                      |           |                        |           |
| Musculoskeletal    | 0.082            | 0.275     | 0.080              | 0.271     |                      |           |                        |           |
| Genitourinary      | 0.049            | 0.216     | 0.131              | 0.338     |                      |           |                        |           |
| Congenital         | 0.003            | 0.050     | 0.004              | 0.059     |                      |           |                        |           |
| Symptoms           | 0.145            | 0.352     | 0.116              | 0.320     |                      |           |                        |           |
| Accident           | 0.123            | 0.328     | 0.092              | 0.289     |                      |           |                        |           |

---

|               |         |       |         |         |         |
|---------------|---------|-------|---------|---------|---------|
| Factors       | 0.028   | 0.165 | 0.032   | 0.176   |         |
| # Individuals | 115,430 |       | 117,844 | 205,762 | 198,992 |

---

30 percent random sample of the population of employed individuals 40-59 years of age in 1993 who were hospitalized at some point between years 1994-2004 and not-hospitalized during the same period. Earning and Non-labor income and both measure as price base (PBA) amounts in 1992 (one PBA is 33,700 SEK (= £2,9452 in December 2018))
